# Supplementary material for: Schizophrenia, Bipolar Disorder, and Alzheimer’s Disease are not Causal Factors of Bone Mineral Density: A Mendelian Randomization Analysis
Source: Springer Nature journal article supplement (doi:10.1007/s00223-019-00625-x), 2019-11-02
Supplement: MOESM4 [file 17343452]

| **Traits** | **Author** | **Year** | **Sample size** | **Data source** | **Population** |
| --- | --- | --- | --- | --- | --- |
| Schizophrenia | Ripke S et al [11] | 2014 | 36,989 cases and 113,075 controls | PGC Schizophrenia Working Group | Mixed (European and Asian ancestry) |
| Bipolar disorder | Sklar P et al [12] | 2011 | 7,481 cases and 9,250 controls | PGC Bipolar Disorder Working Group | European ancestry |
| Alzheimer’s disease | Lambert JC et al [13] | 2013 | Meta-analyses of GWAS with 17,008 cases and 37,154 controls | IGAP | European ancestry |
| Bone mineral density | Zheng HF et al [14] | 2015 | 508,253 cases and 53,236 controls | GEFOS Consortium | European ancestry |
| Body mass index | Locke AE et al [15] | 2015 | Meta-analysis with 339,224 individuals from 125 studies | GIANT Consortium | European ancestry |
| Waist circumference | [Randall JC](https://www.ncbi.nlm.nih.gov/pubmed/?term=Randall JC[Author]&cauthor=true&cauthor_uid=23754948) et al [16] | 2013 | Meta-analysis with 36,231 men, 45,192 women from 34 studies | GIANT Consortium | European ancestry |
| Hip circumference and waist-to-hip circumference ratio | Shungin D et al [17] | 2015 | Meta-analyses of GWAS and Metabochip data with 224,459 individuals | GIANT Consortium | European ancestry |
| Type 2 diabetes | Morris AP et al [18] | 2012 | Meta-analyses of Metabochip data including 34,840 cases and 114,981 controls | DIAGRAM Consortium | European ancestry |
| Fasting glucose | Dupuis J et al [19] | 2010 | Meta-analyses of GWAS with 46,186 individuals from 21 studies | MAGIC | European ancestry |
| 2-hour glucose | Saxena R et al [20] | 2010 | Meta-analyses of GWAS with 15,234 individuals from 9 studies | MAGIC | European ancestry |
| Systolic and diastolic blood pressure | Ehret GB et al [21] | 2011 | Meta-analyses of GWAS with 69,395 individuals from 29 studies | ICBP | European ancestry |
| Smoking behavior | Furberg H et al [22] | 2010 | Meta-analyses of 74,053 smoking phenotypes | TGC | European ancestry |
| Alcohol consumption behavior | Clarke TK et al [23] | 2017 | 112,117 individuals | UKB | European ancestry |
| Inflammatory bowel diseases | Liu LZ et al [24] | 2015 | genome-wide or Immunochip genotype data of 96,486 individuals | IIBDGC | Mixed (European and Asian ancestry) |

| PGC=Psychiatric Genomics Consortium; IGAP=International Genomics of Alzheimer’s Project; GEFOS=Genetic Factors for Osteoporosis; GIANT=Genetic Investigation of ANthropometric Traits; DIAGRAM=DIAbetes Genetics Replication And Meta-analysis; MAGIC=Meta-Analyses of Glucose and Insulin-related traits Consortium; ICBP=International Consortium of Blood Pressure; TGC=[Tobacco and Genetics Consortium](https://www.ncbi.nlm.nih.gov/pubmed/?term=Tobacco and Genetics Consortium[Corporate Author]); UKB=UK Biobank; IIBDGC=IBD from International Inflammatory Bowel Disease Genetics Consortium; GWAS=genome-wide association study |
| --- |

Table S1. The detailed characteristics of studies associated with exposures,outcomes and confounding factors
