# Supplementary material for: Schizophrenia, Bipolar Disorder, and Alzheimer’s Disease are not Causal Factors of Bone Mineral Density: A Mendelian Randomization Analysis
Source: Springer Nature journal article supplement (doi:10.1007/s00223-019-00625-x), 2019-11-02
Supplement: MOESM5 [file 17343452]

| **Exposure** | **SNP** | **Chr** | **Mapped genes** | **Effect allele*** | **Confounding factors** | ***p-*Value** | **Sample size (N)** |
| --- | --- | --- | --- | --- | --- | --- | --- |
| Schizophrenia | rs301797 | 1 | RERE, RERE-AS1 | A | BMI | 0.3290 | 226537 |
| Schizophrenia | rs832187 | 3 | THOC7, C3orf49 | T | BMI | 0.7452 | 233455 |
| Schizophrenia | rs1106568 | 4 | GPM6A | A | BMI | 0.6418 | 233671 |
| Schizophrenia | rs1501357 | 5 | HCN1 | T | BMI | 0.8841 | 233942 |
| Schizophrenia | rs1702294 | 1 | MIR137HG | T | BMI | 0.5004 | 233870 |
| Schizophrenia | rs2007044 | 12 | CACNA1C | A | BMI | 0.8538 | 233925 |
| Schizophrenia | rs2053079 | 19 | ZNF536 | A | BMI | 0.4854 | 233920 |
| Schizophrenia | rs2693698 | 14 | BCL11B | A | BMI | 0.0973 | 232804 |
| Schizophrenia | rs2905426 | 19 | GATAD2A, MAU2 | T | BMI | 0.0047 | 82896 |
| Schizophrenia | rs2945232 | 8 | FAM86B3P, ALG1L13P | T | BMI | 0.0429 | 233412 |
| Schizophrenia | rs2973155 | 5 | GRIA1, LINC01470 | T | BMI | 0.7323 | 233974 |
| Schizophrenia | rs3735025 | 7 | DGKI | T | BMI | 0.0512 | 233994 |
| Schizophrenia | rs3798869 | 6 | SNAP91 | A | BMI | 0.9162 | 233822 |
| Schizophrenia | rs3849046 | 5 | ETF1 | T | BMI | 0.0221 | 232396 |
| Schizophrenia | rs4129585 | 8 | TSNARE1 | A | BMI | 0.0550 | 233841 |
| Schizophrenia | rs4391122 | 5 | ZSWIM6, LINC02057 | A | BMI | 0.0062 | 233068 |
| Schizophrenia | rs4523957 | 17 | SRR | T | BMI | 0.0164 | 232823 |
| Schizophrenia | rs4648845 | 1 | PLCH2 | T | BMI | 0.1996 | 188174 |
| Schizophrenia | rs6065094 | 20 | PPP1R16B | A | BMI | 0.9402 | 233937 |
| Schizophrenia | rs6430095 | 2 | Not reported | N | BMI | 0.8929 | 222266 |
| Schizophrenia | rs6984242 | 8 | AC107934.2, AC107934.1 | A | BMI | 0.9354 | 233960 |
| Schizophrenia | rs7193419 | 16 | AC018846.1, AC138305.1 | T | BMI | 0.7870 | 233997 |
| Schizophrenia | rs7432375 | 3 | STAG1 | A | BMI | 0.9354 | 233525 |
| Schizophrenia | rs7819570 | 8 | AC090578.1 | T | BMI | 0.1604 | 233800 |
| Schizophrenia | rs7893279 | 10 | CACNB2 | T | BMI | 0.7302 | 233824 |
| Schizophrenia | rs7951870 | 11 | DGKZ | T | BMI | 0.0455 | 233945 |
| Schizophrenia | rs8044995 | 16 | NFATC3 | A | BMI | 0.7549 | 322105 |
| Schizophrenia | rs8139773 | 22 | CACNA1I | A | BMI | 0.7145 | 232919 |
| Schizophrenia | rs10520163 | 4 | CLCN3 | T | BMI | 0.3302 | 233996 |
| Schizophrenia | rs11027857 | 11 | AC015771.1, RF00019 | A | BMI | 0.8712 | 233757 |
| Schizophrenia | rs12129573 | 1 | RN7SKP19, LINC01360 | A | BMI | 0.7522 | 234019 |
| Schizophrenia | rs12887734 | 14 | APOPT1, AL139300.1, KLC1 | T | BMI | 0.4351 | 233869 |
| Schizophrenia | rs12903146 | 15 | AC104574.2 | A | BMI | 0.6171 | 233673 |
| Schizophrenia | rs13217619 | 6 | ZSCAN31 | T | BMI | 0.9883 | 233583 |
| Schizophrenia | rs13240464 | 7 | IMMP2L | T | BMI | 0.0542 | 233931 |
| Schizophrenia | rs16867576 | 5 | MEF2C-AS1 | A | BMI | 0.0104 | 233605 |
| Schizophrenia | rs17194490 | 3 | CNTN4 | T | BMI | 0.1387 | 233614 |
| Schizophrenia | rs34796896 | 3 | FXR1 | A | BMI | 0.0073 | 233160 |
| Schizophrenia | rs36068923 | 8 | AC090819.1, AC073023.1 | A | BMI | 0.4437 | 234012 |
| Schizophrenia | rs58120505 | 7 | MAD1L1 | T | BMI | 0.9790 | 233731 |
| Schizophrenia | rs59979824 | 2 | AC092638.1, PCGEM1 | A | BMI | 0.6964 | 226358 |
| Schizophrenia | rs73036062 | 11 | IGSF9B | A | BMI | 0.0117 | 218269 |
| Schizophrenia | rs75968099 | 3 | LINC02033, HSPD1P6 | T | BMI | 0.6737 | 233986 |
| Schizophrenia | rs1405059388 | 1 | LOC105371427 | T | BMI | 0.5816 | 233852 |
| Bipolar disorder | rs9371601 | 6 | SYNE1 | G | BMI | 0.0821 | 320817 |
| Bipolar disorder | rs10994397 | 10 | ANK3 | C | BMI | 0.2076 | 233792 |
| Bipolar disorder | rs12576775 | 11 | TENM4 | A | BMI | 0.1965 | 233971 |
| Alzheimer’s disease | rs190982 | 5 | MEF2C-AS1 | G | BMI | 0.6755 | 220596 |
| Alzheimer’s disease | rs1476679 | 7 | ZCWPW1 | C | BMI | 0.5102 | 226463 |
| Alzheimer’s disease | rs6656401 | 1 | CR1 | A | BMI | 0.9342 | 292090 |
| Alzheimer’s disease | rs7274581 | 20 | CASS4 | C | BMI | 0.3873 | 309850 |
| Alzheimer’s disease | rs10498633 | 14 | SLC24A4 | T | BMI | 0.8110 | 233975 |
| Alzheimer’s disease | rs10792832 | 11 | RNU6-560P, AP003097.2 | A | BMI | 0.0134 | 233994 |
| Alzheimer’s disease | rs10948363 | 6 | CD2AP | G | BMI | 0.0116 | 234017 |
| Alzheimer’s disease | rs11218343 | 11 | SORL1 | C | BMI | 0.5572 | 215477 |
| Alzheimer’s disease | rs35349669 | 2 | INPP5D | T | BMI | 0.7698 | 220844 |
| Schizophrenia | rs301797 | 1 | RERE, RERE-AS1 | A | Waist circumference:males | 0.9300 | 36545 |
| Schizophrenia | rs832187 | 3 | THOC7, C3orf49 | T | Waist circumference:males | 0.7200 | 38368 |
| Schizophrenia | rs1106568 | 4 | GPM6A | A | Waist circumference:males | 0.4800 | 38219 |
| Schizophrenia | rs1501357 | 5 | HCN1 | T | Waist circumference:males | 0.8700 | 38368 |
| Schizophrenia | rs1702294 | 1 | MIR137HG | T | Waist circumference:males | 0.6200 | 38334 |
| Schizophrenia | rs2007044 | 12 | CACNA1C | A | Waist circumference:males | 0.6500 | 38361 |
| Schizophrenia | rs2053079 | 19 | ZNF536 | A | Waist circumference:males | 0.4800 | 38369 |
| Schizophrenia | rs2693698 | 14 | BCL11B | A | Waist circumference:males | 0.3900 | 38362 |
| Schizophrenia | rs2905426 | 19 | GATAD2A, MAU2 | T | Waist circumference:males | 0.7200 | 611 |
| Schizophrenia | rs2945232 | 8 | FAM86B3P, ALG1L13P | T | Waist circumference:males | 0.2400 | 38367 |
| Schizophrenia | rs2973155 | 5 | GRIA1, LINC01470 | T | Waist circumference:males | 0.4500 | 38368 |
| Schizophrenia | rs3735025 | 7 | DGKI | T | Waist circumference:males | 0.3300 | 38368 |
| Schizophrenia | rs3798869 | 6 | SNAP91 | A | Waist circumference:males | 0.1400 | 38367 |
| Schizophrenia | rs3849046 | 5 | ETF1 | T | Waist circumference:males | 0.5100 | 38359 |
| Schizophrenia | rs4129585 | 8 | TSNARE1 | A | Waist circumference:males | 0.7400 | 38315 |
| Schizophrenia | rs4391122 | 5 | ZSWIM6, LINC02057 | A | Waist circumference:males | 0.3900 | 38366 |
| Schizophrenia | rs4523957 | 17 | SRR | T | Waist circumference:males | 0.1200 | 38367 |
| Schizophrenia | rs4648845 | 1 | PLCH2 | T | Waist circumference:males | 0.0360 | 22687 |
| Schizophrenia | rs6065094 | 20 | PPP1R16B | A | Waist circumference:males | 0.8500 | 38360 |
| Schizophrenia | rs6430095 | 2 | Not reported | N | Waist circumference:males | 0.3700 | 38363 |
| Schizophrenia | rs6984242 | 8 | AC107934.2, AC107934.1 | A | Waist circumference:males | 0.3900 | 38368 |
| Schizophrenia | rs7193419 | 16 | AC018846.1, AC138305.1 | T | Waist circumference:males | 0.6100 | 38368 |
| Schizophrenia | rs7432375 | 3 | STAG1 | A | Waist circumference:males | 0.0190 | 38325 |
| Schizophrenia | rs7819570 | 8 | AC090578.1 | T | Waist circumference:males | 0.6800 | 38369 |
| Schizophrenia | rs7893279 | 10 | CACNB2 | T | Waist circumference:males | 0.3500 | 38355 |
| Schizophrenia | rs7951870 | 11 | DGKZ | T | Waist circumference:males | 0.4400 | 611 |
| Schizophrenia | rs8044995 | 16 | NFATC3 | A | Waist circumference:males | 0.6500 | 38369 |
| Schizophrenia | rs8139773 | 22 | CACNA1I | A | Waist circumference:males | 0.3400 | 38409 |
| Schizophrenia | rs10520163 | 4 | CLCN3 | T | Waist circumference:males | 0.0430 | 38368 |
| Schizophrenia | rs11027857 | 11 | AC015771.1, RF00019 | A | Waist circumference:males | 0.8800 | 38352 |
| Schizophrenia | rs12129573 | 1 | RN7SKP19, LINC01360 | A | Waist circumference:males | 0.2000 | 38368 |
| Schizophrenia | rs12887734 | 14 | APOPT1, AL139300.1, KLC1 | T | Waist circumference:males | 0.0220 | 38369 |
| Schizophrenia | rs12903146 | 15 | AC104574.2 | A | Waist circumference:males | 0.4800 | 38368 |
| Schizophrenia | rs13217619 | 6 | ZSCAN31 | T | Waist circumference:males | 0.3200 | 38370 |
| Schizophrenia | rs13240464 | 7 | IMMP2L | T | Waist circumference:males | 0.3400 | 38360 |
| Schizophrenia | rs16867576 | 5 | MEF2C-AS1 | A | Waist circumference:males | 0.7100 | 38369 |
| Schizophrenia | rs17194490 | 3 | CNTN4 | T | Waist circumference:males | 0.4900 | 38368 |
| Schizophrenia | rs34796896 | 3 | FXR1 | A | Waist circumference:males | 0.1200 | 38368 |
| Schizophrenia | rs36068923 | 8 | AC090819.1, AC073023.1 | A | Waist circumference:males | 0.1600 | 38369 |
| Schizophrenia | rs58120505 | 7 | MAD1L1 | T | Waist circumference:males | 0.9500 | 38367 |
| Schizophrenia | rs59979824 | 2 | AC092638.1, PCGEM1 | A | Waist circumference:males | 1.0000 | 38300 |
| Schizophrenia | rs73036062 | 11 | IGSF9B | A | Waist circumference:males | 0.0760 | 38348 |
| Schizophrenia | rs75968099 | 3 | LINC02033, HSPD1P6 | T | Waist circumference:males | 0.5200 | 38368 |
| Schizophrenia | rs1405059388 | 1 | LOC105371427 | T | Waist circumference:males | 0.3400 | 612 |
| Bipolar disorder | rs9371601 | 6 | SYNE1 | G | Waist circumference:males | 0.7600 | 38356 |
| Bipolar disorder | rs10994397 | 10 | ANK3 | C | Waist circumference:males | 0.1900 | 37905 |
| Bipolar disorder | rs12576775 | 11 | TENM4 | A | Waist circumference:males | 0.9100 | 38369 |
| Alzheimer’s disease | rs190982 | 5 | MEF2C-AS1 | G | Waist circumference:males | 0.0580 | 36478 |
| Alzheimer’s disease | rs1476679 | 7 | ZCWPW1 | C | Waist circumference:males | 0.4700 | 36558 |
| Alzheimer’s disease | rs6656401 | 1 | CR1 | A | Waist circumference:males | 0.0920 | 38252 |
| Alzheimer’s disease | rs7274581 | 20 | CASS4 | C | Waist circumference:males | 0.8300 | 38370 |
| Alzheimer’s disease | rs10498633 | 14 | SLC24A4 | T | Waist circumference:males | 0.2400 | 38366 |
| Alzheimer’s disease | rs10792832 | 11 | RNU6-560P, AP003097.2 | A | Waist circumference:males | 0.9700 | 38368 |
| Alzheimer’s disease | rs10948363 | 6 | CD2AP | G | Waist circumference:males | 0.5000 | 38369 |
| Alzheimer’s disease | rs11218343 | 11 | SORL1 | C | Waist circumference:males | 0.6400 | 36293 |
| Alzheimer’s disease | rs35349669 | 2 | INPP5D | T | Waist circumference:males | 0.5900 | 612 |
| Schizophrenia | rs301797 | 1 | RERE, RERE-AS1 | A | Waist circumference:females | 0.3900 | 45464 |
| Schizophrenia | rs832187 | 3 | THOC7, C3orf49 | T | Waist circumference:females | 0.4400 | 47320 |
| Schizophrenia | rs1106568 | 4 | GPM6A | A | Waist circumference:females | 0.1000 | 47118 |
| Schizophrenia | rs1501357 | 5 | HCN1 | T | Waist circumference:females | 0.1300 | 47310 |
| Schizophrenia | rs1702294 | 1 | MIR137HG | T | Waist circumference:females | 0.0034 | 47274 |
| Schizophrenia | rs2007044 | 12 | CACNA1C | A | Waist circumference:females | 0.0380 | 47306 |
| Schizophrenia | rs2053079 | 19 | ZNF536 | A | Waist circumference:females | 0.8800 | 47320 |
| Schizophrenia | rs2693698 | 14 | BCL11B | A | Waist circumference:females | 0.8200 | 47315 |
| Schizophrenia | rs2905426 | 19 | GATAD2A, MAU2 | T | Waist circumference:females | 0.8400 | 345 |
| Schizophrenia | rs2945232 | 8 | FAM86B3P, ALG1L13P | T | Waist circumference:females | 0.2100 | 47319 |
| Schizophrenia | rs2973155 | 5 | GRIA1, LINC01470 | T | Waist circumference:females | 0.5600 | 47316 |
| Schizophrenia | rs3735025 | 7 | DGKI | T | Waist circumference:females | 0.2500 | 47319 |
| Schizophrenia | rs3798869 | 6 | SNAP91 | A | Waist circumference:females | 0.5700 | 47317 |
| Schizophrenia | rs3849046 | 5 | ETF1 | T | Waist circumference:females | 0.3200 | 47308 |
| Schizophrenia | rs4129585 | 8 | TSNARE1 | A | Waist circumference:females | 0.1400 | 47242 |
| Schizophrenia | rs4391122 | 5 | ZSWIM6, LINC02057 | A | Waist circumference:females | 0.2100 | 47315 |
| Schizophrenia | rs4523957 | 17 | SRR | T | Waist circumference:females | 0.3300 | 47319 |
| Schizophrenia | rs4648845 | 1 | PLCH2 | T | Waist circumference:females | 0.1200 | 29022 |
| Schizophrenia | rs6065094 | 20 | PPP1R16B | A | Waist circumference:females | 0.4400 | 47310 |
| Schizophrenia | rs6430095 | 2 | Not reported | N | Waist circumference:females | 0.2600 | 47315 |
| Schizophrenia | rs6984242 | 8 | AC107934.2, AC107934.1 | A | Waist circumference:females | 0.9500 | 47319 |
| Schizophrenia | rs7193419 | 16 | AC018846.1, AC138305.1 | T | Waist circumference:females | 0.5800 | 47319 |
| Schizophrenia | rs7432375 | 3 | STAG1 | A | Waist circumference:females | 0.9200 | 47259 |
| Schizophrenia | rs7819570 | 8 | AC090578.1 | T | Waist circumference:females | 0.3300 | 47320 |
| Schizophrenia | rs7893279 | 10 | CACNB2 | T | Waist circumference:females | 0.2600 | 47299 |
| Schizophrenia | rs7951870 | 11 | DGKZ | T | Waist circumference:females | 0.2000 | 346 |
| Schizophrenia | rs8044995 | 16 | NFATC3 | A | Waist circumference:females | 0.6300 | 47320 |
| Schizophrenia | rs8139773 | 22 | CACNA1I | A | Waist circumference:females | 0.8200 | 47315 |
| Schizophrenia | rs10520163 | 4 | CLCN3 | T | Waist circumference:females | 0.3900 | 47319 |
| Schizophrenia | rs11027857 | 11 | AC015771.1, RF00019 | A | Waist circumference:females | 0.6800 | 47302 |
| Schizophrenia | rs12129573 | 1 | RN7SKP19, LINC01360 | A | Waist circumference:females | 0.8100 | 47319 |
| Schizophrenia | rs12887734 | 14 | APOPT1, AL139300.1, KLC1 | T | Waist circumference:females | 0.3300 | 47319 |
| Schizophrenia | rs12903146 | 15 | AC104574.2 | A | Waist circumference:females | 0.9900 | 47319 |
| Schizophrenia | rs13217619 | 6 | ZSCAN31 | T | Waist circumference:females | 0.9100 | 47321 |
| Schizophrenia | rs13240464 | 7 | IMMP2L | T | Waist circumference:females | 0.6600 | 47307 |
| Schizophrenia | rs16867576 | 5 | MEF2C-AS1 | A | Waist circumference:females | 0.6500 | 47320 |
| Schizophrenia | rs17194490 | 3 | CNTN4 | T | Waist circumference:females | 0.3800 | 47319 |
| Schizophrenia | rs34796896 | 3 | FXR1 | A | Waist circumference:females | 0.6800 | 47319 |
| Schizophrenia | rs36068923 | 8 | AC090819.1, AC073023.1 | A | Waist circumference:females | 0.9900 | 47320 |
| Schizophrenia | rs58120505 | 7 | MAD1L1 | T | Waist circumference:females | 0.6900 | 47315 |
| Schizophrenia | rs59979824 | 2 | AC092638.1, PCGEM1 | A | Waist circumference:females | 0.5000 | 47243 |
| Schizophrenia | rs73036062 | 11 | IGSF9B | A | Waist circumference:females | 0.1600 | 47302 |
| Schizophrenia | rs75968099 | 3 | LINC02033, HSPD1P6 | T | Waist circumference:females | 0.2700 | 47319 |
| Schizophrenia | rs1405059388 | 1 | LOC105371427 | T | Waist circumference:females | 0.2100 | 346 |
| Bipolar disorder | rs9371601 | 6 | SYNE1 | G | Waist circumference:females | 0.4900 | 47307 |
| Bipolar disorder | rs10994397 | 10 | ANK3 | C | Waist circumference:females | 0.4900 | 46886 |
| Bipolar disorder | rs12576775 | 11 | TENM4 | A | Waist circumference:females | 0.6100 | 47320 |
| Alzheimer’s disease | rs190982 | 5 | MEF2C-AS1 | G | Waist circumference:females | 0.7300 | 44897 |
| Alzheimer’s disease | rs1476679 | 7 | ZCWPW1 | C | Waist circumference:females | 0.2900 | 45483 |
| Alzheimer’s disease | rs6656401 | 1 | CR1 | A | Waist circumference:females | 0.4400 | 47205 |
| Alzheimer’s disease | rs7274581 | 20 | CASS4 | C | Waist circumference:females | 0.8200 | 47320 |
| Alzheimer’s disease | rs10498633 | 14 | SLC24A4 | T | Waist circumference:females | 0.8300 | 47314 |
| Alzheimer’s disease | rs10792832 | 11 | RNU6-560P, AP003097.2 | A | Waist circumference:females | 0.1300 | 47319 |
| Alzheimer’s disease | rs10948363 | 6 | CD2AP | G | Waist circumference:females | 0.4000 | 47320 |
| Alzheimer’s disease | rs11218343 | 11 | SORL1 | C | Waist circumference:females | 0.1000 | 44503 |
| Alzheimer’s disease | rs35349669 | 2 | INPP5D | T | Waist circumference:females | 0.3400 | 346 |
| Schizophrenia | rs301797 | 1 | RERE, RERE-AS1 | A | Hip circumference | 0.2000 | 141643 |
| Schizophrenia | rs832187 | 3 | THOC7, C3orf49 | T | Hip circumference | 0.9000 | 145205 |
| Schizophrenia | rs1106568 | 4 | GPM6A | A | Hip circumference | 0.8900 | 145141 |
| Schizophrenia | rs1501357 | 5 | HCN1 | T | Hip circumference | 0.2800 | 145437 |
| Schizophrenia | rs1702294 | 1 | MIR137HG | T | Hip circumference | 0.6000 | 145358 |
| Schizophrenia | rs2007044 | 12 | CACNA1C | A | Hip circumference | 0.9100 | 145429 |
| Schizophrenia | rs2053079 | 19 | ZNF536 | A | Hip circumference | 0.4300 | 145432 |
| Schizophrenia | rs2693698 | 14 | BCL11B | A | Hip circumference | 0.4500 | 145162 |
| Schizophrenia | rs2905426 | 19 | GATAD2A, MAU2 | T | Hip circumference | 0.0240 | 75216 |
| Schizophrenia | rs2945232 | 8 | FAM86B3P, ALG1L13P | T | Hip circumference | 0.6400 | 145261 |
| Schizophrenia | rs2973155 | 5 | GRIA1, LINC01470 | T | Hip circumference | 0.6300 | 145424 |
| Schizophrenia | rs3735025 | 7 | DGKI | T | Hip circumference | 0.1500 | 145445 |
| Schizophrenia | rs3798869 | 6 | SNAP91 | A | Hip circumference | 0.2000 | 145382 |
| Schizophrenia | rs3849046 | 5 | ETF1 | T | Hip circumference | 0.4600 | 145353 |
| Schizophrenia | rs4129585 | 8 | TSNARE1 | A | Hip circumference | 0.1900 | 145293 |
| Schizophrenia | rs4391122 | 5 | ZSWIM6, LINC02057 | A | Hip circumference | 0.0051 | 145250 |
| Schizophrenia | rs4523957 | 17 | SRR | T | Hip circumference | 1.0000 | 144979 |
| Schizophrenia | rs4648845 | 1 | PLCH2 | T | Hip circumference | 0.0220 | 117454 |
| Schizophrenia | rs6065094 | 20 | PPP1R16B | A | Hip circumference | 0.7800 | 145428 |
| Schizophrenia | rs6430095 | 2 | Not reported | N | Hip circumference | 0.1200 | 133703 |
| Schizophrenia | rs6984242 | 8 | AC107934.2, AC107934.1 | A | Hip circumference | 0.7500 | 145440 |
| Schizophrenia | rs7193419 | 16 | AC018846.1, AC138305.1 | T | Hip circumference | 0.6200 | 145445 |
| Schizophrenia | rs7432375 | 3 | STAG1 | A | Hip circumference | 0.3500 | 145356 |
| Schizophrenia | rs7819570 | 8 | AC090578.1 | T | Hip circumference | 0.8300 | 145384 |
| Schizophrenia | rs7893279 | 10 | CACNB2 | T | Hip circumference | 0.3900 | 145313 |
| Schizophrenia | rs7951870 | 11 | DGKZ | T | Hip circumference | 0.3900 | 145383 |
| Schizophrenia | rs8044995 | 16 | NFATC3 | A | Hip circumference | 0.9100 | 227390 |
| Schizophrenia | rs8139773 | 22 | CACNA1I | A | Hip circumference | 0.3400 | 145202 |
| Schizophrenia | rs10520163 | 4 | CLCN3 | T | Hip circumference | 0.0450 | 145453 |
| Schizophrenia | rs11027857 | 11 | AC015771.1, RF00019 | A | Hip circumference | 0.6700 | 145372 |
| Schizophrenia | rs12129573 | 1 | RN7SKP19, LINC01360 | A | Hip circumference | 0.7400 | 145454 |
| Schizophrenia | rs12887734 | 14 | APOPT1, AL139300.1, KLC1 | T | Hip circumference | 0.9500 | 145397 |
| Schizophrenia | rs12903146 | 15 | AC104574.2 | A | Hip circumference | 0.9100 | 145314 |
| Schizophrenia | rs13217619 | 6 | ZSCAN31 | T | Hip circumference | 0.8900 | 145452 |
| Schizophrenia | rs13240464 | 7 | IMMP2L | T | Hip circumference | 0.3400 | 145421 |
| Schizophrenia | rs16867576 | 5 | MEF2C-AS1 | A | Hip circumference | 0.3700 | 145317 |
| Schizophrenia | rs17194490 | 3 | CNTN4 | T | Hip circumference | 0.6900 | 145309 |
| Schizophrenia | rs34796896 | 3 | FXR1 | A | Hip circumference | 0.0970 | 145238 |
| Schizophrenia | rs36068923 | 8 | AC090819.1, AC073023.1 | A | Hip circumference | 0.9600 | 145455 |
| Schizophrenia | rs58120505 | 7 | MAD1L1 | T | Hip circumference | 0.2800 | 145387 |
| Schizophrenia | rs59979824 | 2 | AC092638.1, PCGEM1 | A | Hip circumference | 0.3600 | 138540 |
| Schizophrenia | rs73036062 | 11 | IGSF9B | A | Hip circumference | 0.0560 | 133651 |
| Schizophrenia | rs75968099 | 3 | LINC02033, HSPD1P6 | T | Hip circumference | 0.5100 | 145448 |
| Schizophrenia | rs1405059388 | 1 | LOC105371427 | T | Hip circumference | 0.7100 | 145421 |
| Bipolar disorder | rs9371601 | 6 | SYNE1 | G | Hip circumference | 0.0840 | 226512 |
| Bipolar disorder | rs10994397 | 10 | ANK3 | C | Hip circumference | 0.9300 | 141878 |
| Bipolar disorder | rs12576775 | 11 | TENM4 | A | Hip circumference | 0.1300 | 145446 |
| Alzheimer’s disease | rs190982 | 5 | MEF2C-AS1 | G | Hip circumference | 0.5900 | 133339 |
| Alzheimer’s disease | rs1476679 | 7 | ZCWPW1 | C | Hip circumference | 0.3600 | 141704 |
| Alzheimer’s disease | rs6656401 | 1 | CR1 | A | Hip circumference | 0.9900 | 192548 |
| Alzheimer’s disease | rs7274581 | 20 | CASS4 | C | Hip circumference | 0.8700 | 213910 |
| Alzheimer’s disease | rs10498633 | 14 | SLC24A4 | T | Hip circumference | 0.7200 | 145425 |
| Alzheimer’s disease | rs10792832 | 11 | RNU6-560P, AP003097.2 | A | Hip circumference | 0.2200 | 145436 |
| Alzheimer’s disease | rs10948363 | 6 | CD2AP | G | Hip circumference | 0.0900 | 145451 |
| Alzheimer’s disease | rs11218343 | 11 | SORL1 | C | Hip circumference | 0.2000 | 128501 |
| Alzheimer’s disease | rs35349669 | 2 | INPP5D | T | Hip circumference | 0.3500 | 129591 |
| Schizophrenia | rs301797 | 1 | RERE, RERE-AS1 | A | Waist-to-hip circumference ratio | 0.17 | 138983 |
| Schizophrenia | rs832187 | 3 | THOC7, C3orf49 | T | Waist-to-hip circumference ratio | 0.93 | 142229 |
| Schizophrenia | rs1106568 | 4 | GPM6A | A | Waist-to-hip circumference ratio | 0.35 | 142659 |
| Schizophrenia | rs1501357 | 5 | HCN1 | T | Waist-to-hip circumference ratio | 0.88 | 142741 |
| Schizophrenia | rs1702294 | 1 | MIR137HG | T | Waist-to-hip circumference ratio | 0.28 | 142729 |
| Schizophrenia | rs2007044 | 12 | CACNA1C | A | Waist-to-hip circumference ratio | 0.23 | 142676 |
| Schizophrenia | rs2053079 | 19 | ZNF536 | A | Waist-to-hip circumference ratio | 0.31 | 142525 |
| Schizophrenia | rs2693698 | 14 | BCL11B | A | Waist-to-hip circumference ratio | 0.82 | 140726 |
| Schizophrenia | rs2905426 | 19 | GATAD2A, MAU2 | T | Waist-to-hip circumference ratio | 0.042 | 74933 |
| Schizophrenia | rs2945232 | 8 | FAM86B3P, ALG1L13P | T | Waist-to-hip circumference ratio | 0.91 | 141062 |
| Schizophrenia | rs2973155 | 5 | GRIA1, LINC01470 | T | Waist-to-hip circumference ratio | 0.68 | 142729 |
| Schizophrenia | rs3735025 | 7 | DGKI | T | Waist-to-hip circumference ratio | 0.71 | 142720 |
| Schizophrenia | rs3798869 | 6 | SNAP91 | A | Waist-to-hip circumference ratio | 0.91 | 142653 |
| Schizophrenia | rs3849046 | 5 | ETF1 | T | Waist-to-hip circumference ratio | 0.28 | 142451 |
| Schizophrenia | rs4129585 | 8 | TSNARE1 | A | Waist-to-hip circumference ratio | 0.68 | 141925 |
| Schizophrenia | rs4391122 | 5 | ZSWIM6, LINC02057 | A | Waist-to-hip circumference ratio | 0.094 | 142451 |
| Schizophrenia | rs4523957 | 17 | SRR | T | Waist-to-hip circumference ratio | 0.043 | 142015 |
| Schizophrenia | rs4648845 | 1 | PLCH2 | T | Waist-to-hip circumference ratio | 0.24 | 124893 |
| Schizophrenia | rs6065094 | 20 | PPP1R16B | A | Waist-to-hip circumference ratio | 0.84 | 142666 |
| Schizophrenia | rs6430095 | 2 | Not reported | N | Waist-to-hip circumference ratio | 0.49 | 131005 |
| Schizophrenia | rs6984242 | 8 | AC107934.2, AC107934.1 | A | Waist-to-hip circumference ratio | 0.43 | 142724 |
| Schizophrenia | rs7193419 | 16 | AC018846.1, AC138305.1 | T | Waist-to-hip circumference ratio | 0.66 | 142519 |
| Schizophrenia | rs7432375 | 3 | STAG1 | A | Waist-to-hip circumference ratio | 0.019 | 142482 |
| Schizophrenia | rs7819570 | 8 | AC090578.1 | T | Waist-to-hip circumference ratio | 0.53 | 142605 |
| Schizophrenia | rs7893279 | 10 | CACNB2 | T | Waist-to-hip circumference ratio | 0.4 | 142548 |
| Schizophrenia | rs7951870 | 11 | DGKZ | T | Waist-to-hip circumference ratio | 0.17 | 142645 |
| Schizophrenia | rs8044995 | 16 | NFATC3 | A | Waist-to-hip circumference ratio | 0.0044 | 224382 |
| Schizophrenia | rs8139773 | 22 | CACNA1I | A | Waist-to-hip circumference ratio | 0.0093 | 140358 |
| Schizophrenia | rs10520163 | 4 | CLCN3 | T | Waist-to-hip circumference ratio | 0.16 | 142284 |
| Schizophrenia | rs11027857 | 11 | AC015771.1, RF00019 | A | Waist-to-hip circumference ratio | 0.89 | 142593 |
| Schizophrenia | rs12129573 | 1 | RN7SKP19, LINC01360 | A | Waist-to-hip circumference ratio | 0.25 | 142750 |
| Schizophrenia | rs12887734 | 14 | APOPT1, AL139300.1, KLC1 | T | Waist-to-hip circumference ratio | 0.98 | 142475 |
| Schizophrenia | rs12903146 | 15 | AC104574.2 | A | Waist-to-hip circumference ratio | 0.51 | 142461 |
| Schizophrenia | rs13217619 | 6 | ZSCAN31 | T | Waist-to-hip circumference ratio | 0.76 | 142743 |
| Schizophrenia | rs13240464 | 7 | IMMP2L | T | Waist-to-hip circumference ratio | 0.64 | 142742 |
| Schizophrenia | rs16867576 | 5 | MEF2C-AS1 | A | Waist-to-hip circumference ratio | 0.49 | 142572 |
| Schizophrenia | rs17194490 | 3 | CNTN4 | T | Waist-to-hip circumference ratio | 0.031 | 141961 |
| Schizophrenia | rs34796896 | 3 | FXR1 | A | Waist-to-hip circumference ratio | 0.49 | 142203 |
| Schizophrenia | rs36068923 | 8 | AC090819.1, AC073023.1 | A | Waist-to-hip circumference ratio | 0.83 | 142750 |
| Schizophrenia | rs58120505 | 7 | MAD1L1 | T | Waist-to-hip circumference ratio | 0.67 | 142335 |
| Schizophrenia | rs59979824 | 2 | AC092638.1, PCGEM1 | A | Waist-to-hip circumference ratio | 0.73 | 135913 |
| Schizophrenia | rs73036062 | 11 | IGSF9B | A | Waist-to-hip circumference ratio | 0.47 | 130976 |
| Schizophrenia | rs75968099 | 3 | LINC02033, HSPD1P6 | T | Waist-to-hip circumference ratio | 0.093 | 142749 |
| Schizophrenia | rs1405059388 | 1 | LOC105371427 | T | Waist-to-hip circumference ratio | 0.15 | 142638 |
| Bipolar disorder | rs9371601 | 6 | SYNE1 | G | Waist-to-hip circumference ratio | 0.5100 | 223530 |
| Bipolar disorder | rs10994397 | 10 | ANK3 | C | Waist-to-hip circumference ratio | 0.7900 | 142557 |
| Bipolar disorder | rs12576775 | 11 | TENM4 | A | Waist-to-hip circumference ratio | 0.1400 | 142677 |
| Alzheimer’s disease | rs190982 | 5 | MEF2C-AS1 | G | Waist-to-hip circumference ratio | 0.8100 | 128437 |
| Alzheimer’s disease | rs1476679 | 7 | ZCWPW1 | C | Waist-to-hip circumference ratio | 0.3000 | 139031 |
| Alzheimer’s disease | rs6656401 | 1 | CR1 | A | Waist-to-hip circumference ratio | 0.0560 | 189758 |
| Alzheimer’s disease | rs7274581 | 20 | CASS4 | C | Waist-to-hip circumference ratio | 0.6400 | 211246 |
| Alzheimer’s disease | rs10498633 | 14 | SLC24A4 | T | Waist-to-hip circumference ratio | 0.1100 | 142363 |
| Alzheimer’s disease | rs10792832 | 11 | RNU6-560P, AP003097.2 | A | Waist-to-hip circumference ratio | 0.0160 | 142673 |
| Alzheimer’s disease | rs10948363 | 6 | CD2AP | G | Waist-to-hip circumference ratio | 0.3400 | 142713 |
| Alzheimer’s disease | rs11218343 | 11 | SORL1 | C | Waist-to-hip circumference ratio | 0.1600 | 124744 |
| Alzheimer’s disease | rs35349669 | 2 | INPP5D | T | Waist-to-hip circumference ratio | 0.5900 | 127894 |

| SNP = single nucleotide polymorphism; Chr = chromosome; BMI = bone mass index  *Allele asociated with higher risk of schizophrenia, bipolar disorder and Alzheimer’s disease. |
| --- |
|  |

**Table S2.** Associations of SNPs used in Mendelian randomization analysis with obesity indices.
