# Supplementary material for: Schizophrenia, Bipolar Disorder, and Alzheimer’s Disease are not Causal Factors of Bone Mineral Density: A Mendelian Randomization Analysis
Source: Springer Nature journal article supplement (doi:10.1007/s00223-019-00625-x), 2019-11-02
Supplement: MOESM6 [file 17343452]

| **Exposure** | **SNP** | **Chr** | **Mapped genes** | **Effect allele*** | **Confounding factors** | ***p-*Value** | **Sample size (N)** |
| --- | --- | --- | --- | --- | --- | --- | --- |
| Schizophrenia | rs301797 | 1 | RERE, RERE-AS1 | A | Type 2 diabetes | 0.0490 | 6635 |
| Schizophrenia | rs832187 | 3 | THOC7, C3orf49 | T | Type 2 diabetes | 0.2800 | 9581 |
| Schizophrenia | rs1106568 | 4 | GPM6A | A | Type 2 diabetes | 0.2700 | 11048 |
| Schizophrenia | rs1501357 | 5 | HCN1 | T | Type 2 diabetes | 0.1800 | 9581 |
| Schizophrenia | rs1702294 | 1 | MIR137HG | T | Type 2 diabetes | 0.1700 | 12172 |
| Schizophrenia | rs2007044 | 12 | CACNA1C | A | Type 2 diabetes | 0.2100 | 9581 |
| Schizophrenia | rs2053079 | 19 | ZNF536 | A | Type 2 diabetes | 0.1600 | 9581 |
| Schizophrenia | rs2693698 | 14 | BCL11B | A | Type 2 diabetes | 0.5500 | 9581 |
| Schizophrenia | rs2905426 | 19 | GATAD2A, MAU2 | T | Type 2 diabetes | 0.0310 | 9581 |
| Schizophrenia | rs2945232 | 8 | FAM86B3P, ALG1L13P | T | Type 2 diabetes | 0.0180 | 9581 |
| Schizophrenia | rs2973155 | 5 | GRIA1, LINC01470 | T | Type 2 diabetes | 0.8700 | 11903 |
| Schizophrenia | rs3735025 | 7 | DGKI | T | Type 2 diabetes | 0.8300 | 9581 |
| Schizophrenia | rs3798869 | 6 | SNAP91 | A | Type 2 diabetes | 0.3600 | 9581 |
| Schizophrenia | rs3849046 | 5 | ETF1 | T | Type 2 diabetes | 0.4100 | 12172 |
| Schizophrenia | rs4129585 | 8 | TSNARE1 | A | Type 2 diabetes | 0.0350 | 12172 |
| Schizophrenia | rs4391122 | 5 | ZSWIM6, LINC02057 | A | Type 2 diabetes | 0.2800 | 9581 |
| Schizophrenia | rs4523957 | 17 | SRR | T | Type 2 diabetes | 0.9300 | 9581 |
| Schizophrenia | rs4648845 | 1 | PLCH2 | T | Type 2 diabetes | 0.9900 | 5528 |
| Schizophrenia | rs6065094 | 20 | PPP1R16B | A | Type 2 diabetes | 0.1800 | 12172 |
| Schizophrenia | rs6430095 | 2 | Not reported | N | Type 2 diabetes | 0.0380 | 9581 |
| Schizophrenia | rs6984242 | 8 | AC107934.2, AC107934.1 | A | Type 2 diabetes | 0.9600 | 9581 |
| Schizophrenia | rs7193419 | 16 | AC018846.1, AC138305.1 | T | Type 2 diabetes | 0.5000 | 9581 |
| Schizophrenia | rs7432375 | 3 | STAG1 | A | Type 2 diabetes | 0.2800 | 9581 |
| Schizophrenia | rs7819570 | 8 | AC090578.1 | T | Type 2 diabetes | 0.8800 | 9581 |
| Schizophrenia | rs7893279 | 10 | CACNB2 | T | Type 2 diabetes | 0.1600 | 12172 |
| Schizophrenia | rs7951870 | 11 | DGKZ | T | Type 2 diabetes | 0.8400 | 9581 |
| Schizophrenia | rs8044995 | 16 | NFATC3 | A | Type 2 diabetes | 0.6200 | 9581 |
| Schizophrenia | rs8139773 | 22 | CACNA1I | A | Type 2 diabetes | 0.2500 | 9581 |
| Schizophrenia | rs10520163 | 4 | CLCN3 | T | Type 2 diabetes | 0.4100 | 12172 |
| Schizophrenia | rs11027857 | 11 | AC015771.1, RF00019 | A | Type 2 diabetes | 0.6900 | 12172 |
| Schizophrenia | rs12129573 | 1 | RN7SKP19, LINC01360 | A | Type 2 diabetes | 0.7500 | 9581 |
| Schizophrenia | rs12887734 | 14 | APOPT1, AL139300.1, KLC1 | T | Type 2 diabetes | 0.7200 | 12172 |
| Schizophrenia | rs12903146 | 15 | AC104574.2 | A | Type 2 diabetes | 0.9700 | 9581 |
| Schizophrenia | rs13217619 | 6 | ZSCAN31 | T | Type 2 diabetes | 0.4500 | 9581 |
| Schizophrenia | rs13240464 | 7 | IMMP2L | T | Type 2 diabetes | 0.2800 | 11048 |
| Schizophrenia | rs16867576 | 5 | MEF2C-AS1 | A | Type 2 diabetes | 0.1400 | 9581 |
| Schizophrenia | rs17194490 | 3 | CNTN4 | T | Type 2 diabetes | 0.8900 | 9581 |
| Schizophrenia | rs34796896 | 3 | FXR1 | A | Type 2 diabetes | 0.1600 | 9581 |
| Schizophrenia | rs36068923 | 8 | AC090819.1, AC073023.1 | A | Type 2 diabetes | 0.2000 | 9581 |
| Schizophrenia | rs58120505 | 7 | MAD1L1 | T | Type 2 diabetes | 0.0130 | 12172 |
| Schizophrenia | rs59979824 | 2 | AC092638.1, PCGEM1 | A | Type 2 diabetes | 0.3600 | 12172 |
| Schizophrenia | rs73036062 | 11 | IGSF9B | A | Type 2 diabetes | 0.6100 | 12172 |
| Schizophrenia | rs75968099 | 3 | LINC02033, HSPD1P6 | T | Type 2 diabetes | 0.0220 | 9581 |
| Schizophrenia | rs1405059388 | 1 | LOC105371427 | T | Type 2 diabetes | 0.2500 | 9581 |
| Bipolar disorder | rs9371601 | 6 | SYNE1 | G | Type 2 diabetes | 0.6000 | 12172 |
| Bipolar disorder | rs10994397 | 10 | ANK3 | C | Type 2 diabetes | 0.1300 | 9581 |
| Bipolar disorder | rs12576775 | 11 | TENM4 | A | Type 2 diabetes | 0.7000 | 9581 |
| Alzheimer’s disease | rs190982 | 5 | MEF2C-AS1 | G | Type 2 diabetes | 0.6700 | 8126 |
| Alzheimer’s disease | rs1476679 | 7 | ZCWPW1 | C | Type 2 diabetes | 0.8900 | 9226 |
| Alzheimer’s disease | rs6656401 | 1 | CR1 | A | Type 2 diabetes | 0.2500 | 12172 |
| Alzheimer’s disease | rs7274581 | 20 | CASS4 | C | Type 2 diabetes | 0.8100 | 9581 |
| Alzheimer’s disease | rs10498633 | 14 | SLC24A4 | T | Type 2 diabetes | 0.9200 | 12172 |
| Alzheimer’s disease | rs10792832 | 11 | RNU6-560P, AP003097.2 | A | Type 2 diabetes | 0.3100 | 9581 |
| Alzheimer’s disease | rs10948363 | 6 | CD2AP | G | Type 2 diabetes | 0.2300 | 9581 |
| Alzheimer’s disease | rs11218343 | 11 | SORL1 | C | Type 2 diabetes | 0.0380 | 10742 |
| Alzheimer’s disease | rs35349669 | 2 | INPP5D | T | Type 2 diabetes | 0.7400 | 9148 |
| Schizophrenia | rs301797 | 1 | RERE, RERE-AS1 | A | Fasting glucose | 0.0448 | 46186 |
| Schizophrenia | rs832187 | 3 | THOC7, C3orf49 | T | Fasting glucose | 0.1998 | 46186 |
| Schizophrenia | rs1106568 | 4 | GPM6A | A | Fasting glucose | 0.3504 | 46186 |
| Schizophrenia | rs1501357 | 5 | HCN1 | T | Fasting glucose | 0.5895 | 46186 |
| Schizophrenia | rs1702294 | 1 | MIR137HG | T | Fasting glucose | 0.3176 | 46186 |
| Schizophrenia | rs2007044 | 12 | CACNA1C | A | Fasting glucose | 0.9945 | 46186 |
| Schizophrenia | rs2053079 | 19 | ZNF536 | A | Fasting glucose | 0.7935 | 46186 |
| Schizophrenia | rs2693698 | 14 | BCL11B | A | Fasting glucose | 0.3835 | 46186 |
| Schizophrenia | rs2905426 | 19 | GATAD2A, MAU2 | T | Fasting glucose | 0.2481 | 46186 |
| Schizophrenia | rs2945232 | 8 | FAM86B3P, ALG1L13P | T | Fasting glucose | 0.2718 | 46186 |
| Schizophrenia | rs2973155 | 5 | GRIA1, LINC01470 | T | Fasting glucose | 0.5887 | 46186 |
| Schizophrenia | rs3735025 | 7 | DGKI | T | Fasting glucose | 0.9870 | 46186 |
| Schizophrenia | rs3798869 | 6 | SNAP91 | A | Fasting glucose | 0.1441 | 46186 |
| Schizophrenia | rs3849046 | 5 | ETF1 | T | Fasting glucose | 0.7511 | 46186 |
| Schizophrenia | rs4129585 | 8 | TSNARE1 | A | Fasting glucose | 0.7287 | 46186 |
| Schizophrenia | rs4391122 | 5 | ZSWIM6, LINC02057 | A | Fasting glucose | 0.2718 | 46186 |
| Schizophrenia | rs4523957 | 17 | SRR | T | Fasting glucose | 0.7972 | 46186 |
| Schizophrenia | rs4648845 | 1 | PLCH2 | T | Fasting glucose | 0.7958 | 46186 |
| Schizophrenia | rs6065094 | 20 | PPP1R16B | A | Fasting glucose | 0.1229 | 46186 |
| Schizophrenia | rs6430095 | 2 | Not reported | N | Fasting glucose | 0.8071 | 46186 |
| Schizophrenia | rs6984242 | 8 | AC107934.2, AC107934.1 | A | Fasting glucose | 0.4560 | 46186 |
| Schizophrenia | rs7193419 | 16 | AC018846.1, AC138305.1 | T | Fasting glucose | 0.7412 | 46186 |
| Schizophrenia | rs7432375 | 3 | STAG1 | A | Fasting glucose | 0.7824 | 46186 |
| Schizophrenia | rs7819570 | 8 | AC090578.1 | T | Fasting glucose | 0.0283 | 46186 |
| Schizophrenia | rs7893279 | 10 | CACNB2 | T | Fasting glucose | 0.6400 | 46186 |
| Schizophrenia | rs7951870 | 11 | DGKZ | T | Fasting glucose | 0.1415 | 46186 |
| Schizophrenia | rs8044995 | 16 | NFATC3 | A | Fasting glucose | 0.0083 | 46186 |
| Schizophrenia | rs8139773 | 22 | CACNA1I | A | Fasting glucose | 0.7790 | 46186 |
| Schizophrenia | rs10520163 | 4 | CLCN3 | T | Fasting glucose | 0.5821 | 46186 |
| Schizophrenia | rs11027857 | 11 | AC015771.1, RF00019 | A | Fasting glucose | 0.6635 | 46186 |
| Schizophrenia | rs12129573 | 1 | RN7SKP19, LINC01360 | A | Fasting glucose | 0.6543 | 46186 |
| Schizophrenia | rs12887734 | 14 | APOPT1, AL139300.1, KLC1 | T | Fasting glucose | 0.2372 | 46186 |
| Schizophrenia | rs12903146 | 15 | AC104574.2 | A | Fasting glucose | 0.9525 | 46186 |
| Schizophrenia | rs13217619 | 6 | ZSCAN31 | T | Fasting glucose | 0.1963 | 46186 |
| Schizophrenia | rs13240464 | 7 | IMMP2L | T | Fasting glucose | 0.2672 | 46186 |
| Schizophrenia | rs16867576 | 5 | MEF2C-AS1 | A | Fasting glucose | 0.2381 | 46186 |
| Schizophrenia | rs17194490 | 3 | CNTN4 | T | Fasting glucose | 0.1035 | 46186 |
| Schizophrenia | rs34796896 | 3 | FXR1 | A | Fasting glucose | 0.5504 | 46186 |
| Schizophrenia | rs36068923 | 8 | AC090819.1, AC073023.1 | A | Fasting glucose | 0.7310 | 46186 |
| Schizophrenia | rs58120505 | 7 | MAD1L1 | T | Fasting glucose | 0.7187 | 46186 |
| Schizophrenia | rs59979824 | 2 | AC092638.1, PCGEM1 | A | Fasting glucose | 0.6742 | 46186 |
| Schizophrenia | rs73036062 | 11 | IGSF9B | A | Fasting glucose | 0.0512 | 46186 |
| Schizophrenia | rs75968099 | 3 | LINC02033, HSPD1P6 | T | Fasting glucose | 0.0334 | 46186 |
| Schizophrenia | rs1405059388 | 1 | LOC105371427 | T | Fasting glucose | 0.6221 | 46186 |
| Bipolar disorder | rs9371601 | 6 | SYNE1 | G | Fasting glucose | 0.9441 | 46186 |
| Bipolar disorder | rs10994397 | 10 | ANK3 | C | Fasting glucose | 0.1072 | 46186 |
| Bipolar disorder | rs12576775 | 11 | TENM4 | A | Fasting glucose | 0.0890 | 46186 |
| Alzheimer’s disease | rs190982 | 5 | MEF2C-AS1 | G | Fasting glucose | 0.5635 | 46186 |
| Alzheimer’s disease | rs1476679 | 7 | ZCWPW1 | C | Fasting glucose | 0.7097 | 46186 |
| Alzheimer’s disease | rs6656401 | 1 | CR1 | A | Fasting glucose | 0.5467 | 46186 |
| Alzheimer’s disease | rs7274581 | 20 | CASS4 | C | Fasting glucose | 0.4739 | 46186 |
| Alzheimer’s disease | rs10498633 | 14 | SLC24A4 | T | Fasting glucose | 0.3749 | 46186 |
| Alzheimer’s disease | rs10792832 | 11 | RNU6-560P, AP003097.2 | A | Fasting glucose | 0.5468 | 46186 |
| Alzheimer’s disease | rs10948363 | 6 | CD2AP | G | Fasting glucose | 0.0835 | 46186 |
| Alzheimer’s disease | rs11218343 | 11 | SORL1 | C | Fasting glucose | 0.4039 | 46186 |
| Alzheimer’s disease | rs35349669 | 2 | INPP5D | T | Fasting glucose | 0.3045 | 46186 |
| Schizophrenia | rs301797 | 1 | RERE, RERE-AS1 | A | 2-hour glucose | 0.7755 | 15234 |
| Schizophrenia | rs832187 | 3 | THOC7, C3orf49 | T | 2-hour glucose | 0.2990 | 15234 |
| Schizophrenia | rs1106568 | 4 | GPM6A | A | 2-hour glucose | 0.1481 | 15234 |
| Schizophrenia | rs1501357 | 5 | HCN1 | T | 2-hour glucose | 0.4314 | 15234 |
| Schizophrenia | rs1702294 | 1 | MIR137HG | T | 2-hour glucose | 0.2925 | 15234 |
| Schizophrenia | rs2007044 | 12 | CACNA1C | A | 2-hour glucose | 0.0331 | 15234 |
| Schizophrenia | rs2053079 | 19 | ZNF536 | A | 2-hour glucose | 0.0505 | 15234 |
| Schizophrenia | rs2693698 | 14 | BCL11B | A | 2-hour glucose | 0.8565 | 15234 |
| Schizophrenia | rs2905426 | 19 | GATAD2A, MAU2 | T | 2-hour glucose | 0.3341 | 15234 |
| Schizophrenia | rs2945232 | 8 | FAM86B3P, ALG1L13P | T | 2-hour glucose | 0.9435 | 15234 |
| Schizophrenia | rs2973155 | 5 | GRIA1, LINC01470 | T | 2-hour glucose | 0.6359 | 15234 |
| Schizophrenia | rs3735025 | 7 | DGKI | T | 2-hour glucose | 0.1764 | 15234 |
| Schizophrenia | rs3798869 | 6 | SNAP91 | A | 2-hour glucose | 0.0759 | 15234 |
| Schizophrenia | rs3849046 | 5 | ETF1 | T | 2-hour glucose | 0.4341 | 15234 |
| Schizophrenia | rs4129585 | 8 | TSNARE1 | A | 2-hour glucose | 0.0369 | 15234 |
| Schizophrenia | rs4391122 | 5 | ZSWIM6, LINC02057 | A | 2-hour glucose | 0.0138 | 15234 |
| Schizophrenia | rs4523957 | 17 | SRR | T | 2-hour glucose | 0.5817 | 15234 |
| Schizophrenia | rs4648845 | 1 | PLCH2 | T | 2-hour glucose | 0.6195 | 15234 |
| Schizophrenia | rs6065094 | 20 | PPP1R16B | A | 2-hour glucose | 0.7943 | 15234 |
| Schizophrenia | rs6430095 | 2 | Not reported | N | 2-hour glucose | 0.4879 | 15234 |
| Schizophrenia | rs6984242 | 8 | AC107934.2, AC107934.1 | A | 2-hour glucose | 0.2409 | 15234 |
| Schizophrenia | rs7193419 | 16 | AC018846.1, AC138305.1 | T | 2-hour glucose | 0.6205 | 15234 |
| Schizophrenia | rs7432375 | 3 | STAG1 | A | 2-hour glucose | 0.2316 | 15234 |
| Schizophrenia | rs7819570 | 8 | AC090578.1 | T | 2-hour glucose | 0.4364 | 15234 |
| Schizophrenia | rs7893279 | 10 | CACNB2 | T | 2-hour glucose | 0.7974 | 15234 |
| Schizophrenia | rs7951870 | 11 | DGKZ | T | 2-hour glucose | 0.7310 | 15234 |
| Schizophrenia | rs8044995 | 16 | NFATC3 | A | 2-hour glucose | 0.0695 | 15234 |
| Schizophrenia | rs8139773 | 22 | CACNA1I | A | 2-hour glucose | 0.3499 | 15234 |
| Schizophrenia | rs10520163 | 4 | CLCN3 | T | 2-hour glucose | 0.2634 | 15234 |
| Schizophrenia | rs11027857 | 11 | AC015771.1, RF00019 | A | 2-hour glucose | 0.6064 | 15234 |
| Schizophrenia | rs12129573 | 1 | RN7SKP19, LINC01360 | A | 2-hour glucose | 0.2713 | 15234 |
| Schizophrenia | rs12887734 | 14 | APOPT1, AL139300.1, KLC1 | T | 2-hour glucose | 0.9911 | 15234 |
| Schizophrenia | rs12903146 | 15 | AC104574.2 | A | 2-hour glucose | 0.4342 | 15234 |
| Schizophrenia | rs13217619 | 6 | ZSCAN31 | T | 2-hour glucose | 0.4991 | 15234 |
| Schizophrenia | rs13240464 | 7 | IMMP2L | T | 2-hour glucose | 0.9942 | 15234 |
| Schizophrenia | rs16867576 | 5 | MEF2C-AS1 | A | 2-hour glucose | 0.2894 | 15234 |
| Schizophrenia | rs17194490 | 3 | CNTN4 | T | 2-hour glucose | 0.7249 | 15234 |
| Schizophrenia | rs34796896 | 3 | FXR1 | A | 2-hour glucose | 0.3270 | 15234 |
| Schizophrenia | rs36068923 | 8 | AC090819.1, AC073023.1 | A | 2-hour glucose | 0.6486 | 15234 |
| Schizophrenia | rs58120505 | 7 | MAD1L1 | T | 2-hour glucose | 0.9061 | 15234 |
| Schizophrenia | rs59979824 | 2 | AC092638.1, PCGEM1 | A | 2-hour glucose | 0.2534 | 15234 |
| Schizophrenia | rs73036062 | 11 | IGSF9B | A | 2-hour glucose | 0.8739 | 15234 |
| Schizophrenia | rs75968099 | 3 | LINC02033, HSPD1P6 | T | 2-hour glucose | 0.4992 | 15234 |
| Schizophrenia | rs1405059388 | 1 | LOC105371427 | T | 2-hour glucose | 0.2573 | 15234 |
| Bipolar disorder | rs9371601 | 6 | SYNE1 | G | 2-hour glucose | 0.0804 | 15234 |
| Bipolar disorder | rs10994397 | 10 | ANK3 | C | 2-hour glucose | 0.9782 | 15234 |
| Bipolar disorder | rs12576775 | 11 | TENM4 | A | 2-hour glucose | 0.1704 | 15234 |
| Alzheimer’s disease | rs190982 | 5 | MEF2C-AS1 | G | 2-hour glucose | 0.9213 | 15234 |
| Alzheimer’s disease | rs1476679 | 7 | ZCWPW1 | C | 2-hour glucose | 0.5743 | 15234 |
| Alzheimer’s disease | rs6656401 | 1 | CR1 | A | 2-hour glucose | 0.2386 | 15234 |
| Alzheimer’s disease | rs7274581 | 20 | CASS4 | C | 2-hour glucose | 0.9896 | 15234 |
| Alzheimer’s disease | rs10498633 | 14 | SLC24A4 | T | 2-hour glucose | 0.4447 | 15234 |
| Alzheimer’s disease | rs10792832 | 11 | RNU6-560P, AP003097.2 | A | 2-hour glucose | 0.7068 | 15234 |
| Alzheimer’s disease | rs10948363 | 6 | CD2AP | G | 2-hour glucose | 0.6562 | 15234 |
| Alzheimer’s disease | rs11218343 | 11 | SORL1 | C | 2-hour glucose | 0.1390 | 15234 |
| Alzheimer’s disease | rs35349669 | 2 | INPP5D | T | 2-hour glucose | 0.4038 | 15234 |

| SNP = single nucleotide polymorphism; Chr = chromosome  *Allele asociated with higher risk of schizophrenia, bipolar disorder and Alzheimer’s disease. |
| --- |
|  |

**Table S3.** Associations of SNPs used in Mendelian randomization analysis with glycemic traits.
