# Supplementary material for: Schizophrenia, Bipolar Disorder, and Alzheimer’s Disease are not Causal Factors of Bone Mineral Density: A Mendelian Randomization Analysis
Source: Springer Nature journal article supplement (doi:10.1007/s00223-019-00625-x), 2019-11-02
Supplement: MOESM7 [file 17343452]

| **Exposure** | **SNP** | **Chr** | **Mapped genes** | **Effect allele*** | **Confounding factors** | ***p-*Value** | **Sample size (N)** |
| --- | --- | --- | --- | --- | --- | --- | --- |
| Schizophrenia | rs301797 | 1 | RERE, RERE-AS1 | A | Systolic blood pressure | 0.2494 | 66771 |
| Schizophrenia | rs832187 | 3 | THOC7, C3orf49 | T | Systolic blood pressure | 0.3865 | 66420 |
| Schizophrenia | rs1106568 | 4 | GPM6A | A | Systolic blood pressure | 0.3649 | 69626 |
| Schizophrenia | rs1501357 | 5 | HCN1 | T | Systolic blood pressure | 0.1961 | 69308 |
| Schizophrenia | rs1702294 | 1 | MIR137HG | T | Systolic blood pressure | 0.4923 | 68336 |
| Schizophrenia | rs2007044 | 12 | CACNA1C | A | Systolic blood pressure | 0.8083 | 69105 |
| Schizophrenia | rs2053079 | 19 | ZNF536 | A | Systolic blood pressure | 0.2155 | 68483 |
| Schizophrenia | rs2693698 | 14 | BCL11B | A | Systolic blood pressure | 0.2489 | 57831 |
| Schizophrenia | rs2905426 | 19 | GATAD2A, MAU2 | T | Systolic blood pressure | 0.1884 | 68279 |
| Schizophrenia | rs2945232 | 8 | FAM86B3P, ALG1L13P | T | Systolic blood pressure | 0.0046 | 60861 |
| Schizophrenia | rs2973155 | 5 | GRIA1, LINC01470 | T | Systolic blood pressure | 0.3732 | 69670 |
| Schizophrenia | rs3735025 | 7 | DGKI | T | Systolic blood pressure | 0.1789 | 68794 |
| Schizophrenia | rs3798869 | 6 | SNAP91 | A | Systolic blood pressure | 0.8933 | 68239 |
| Schizophrenia | rs3849046 | 5 | ETF1 | T | Systolic blood pressure | 0.2332 | 68941 |
| Schizophrenia | rs4129585 | 8 | TSNARE1 | A | Systolic blood pressure | 0.0932 | 65522 |
| Schizophrenia | rs4391122 | 5 | ZSWIM6, LINC02057 | A | Systolic blood pressure | 0.2948 | 65350 |
| Schizophrenia | rs4523957 | 17 | SRR | T | Systolic blood pressure | 0.7968 | 63117 |
| Schizophrenia | rs4648845 | 1 | PLCH2 | T | Systolic blood pressure | 0.1124 | 33333 |
| Schizophrenia | rs6065094 | 20 | PPP1R16B | A | Systolic blood pressure | 0.8077 | 69719 |
| Schizophrenia | rs6430095 | 2 | Not reported | N | Systolic blood pressure | 0.8893 | 67131 |
| Schizophrenia | rs6984242 | 8 | AC107934.2, AC107934.1 | A | Systolic blood pressure | 0.1685 | 69478 |
| Schizophrenia | rs7193419 | 16 | AC018846.1, AC138305.1 | T | Systolic blood pressure | 0.2690 | 68817 |
| Schizophrenia | rs7432375 | 3 | STAG1 | A | Systolic blood pressure | 0.8374 | 69041 |
| Schizophrenia | rs7819570 | 8 | AC090578.1 | T | Systolic blood pressure | 0.8635 | 66282 |
| Schizophrenia | rs7893279 | 10 | CACNB2 | T | Systolic blood pressure | 0.0229 | 69730 |
| Schizophrenia | rs7951870 | 11 | DGKZ | T | Systolic blood pressure | 0.1290 | 68850 |
| Schizophrenia | rs8044995 | 16 | NFATC3 | A | Systolic blood pressure | 0.7238 | 69027 |
| Schizophrenia | rs8139773 | 22 | CACNA1I | A | Systolic blood pressure | 0.0420 | 59993 |
| Schizophrenia | rs10520163 | 4 | CLCN3 | T | Systolic blood pressure | 0.2124 | 66209 |
| Schizophrenia | rs11027857 | 11 | AC015771.1, RF00019 | A | Systolic blood pressure | 0.4368 | 68636 |
| Schizophrenia | rs12129573 | 1 | RN7SKP19, LINC01360 | A | Systolic blood pressure | 0.0161 | 69459 |
| Schizophrenia | rs12887734 | 14 | APOPT1, AL139300.1, KLC1 | T | Systolic blood pressure | 0.1802 | 67261 |
| Schizophrenia | rs12903146 | 15 | AC104574.2 | A | Systolic blood pressure | 0.2267 | 67792 |
| Schizophrenia | rs13217619 | 6 | ZSCAN31 | T | Systolic blood pressure | 0.3521 | 65692 |
| Schizophrenia | rs13240464 | 7 | IMMP2L | T | Systolic blood pressure | 0.9785 | 69588 |
| Schizophrenia | rs16867576 | 5 | MEF2C-AS1 | A | Systolic blood pressure | 0.2216 | 65974 |
| Schizophrenia | rs17194490 | 3 | CNTN4 | T | Systolic blood pressure | 0.0261 | 61539 |
| Schizophrenia | rs34796896 | 3 | FXR1 | A | Systolic blood pressure | 0.3282 | 61741 |
| Schizophrenia | rs36068923 | 8 | AC090819.1, AC073023.1 | A | Systolic blood pressure | 0.8561 | 68120 |
| Schizophrenia | rs58120505 | 7 | MAD1L1 | T | Systolic blood pressure | 0.1645 | 68627 |
| Schizophrenia | rs59979824 | 2 | AC092638.1, PCGEM1 | A | Systolic blood pressure | 0.9737 | 65160 |
| Schizophrenia | rs73036062 | 11 | IGSF9B | A | Systolic blood pressure | 0.5136 | 67763 |
| Schizophrenia | rs75968099 | 3 | LINC02033, HSPD1P6 | T | Systolic blood pressure | 0.6436 | 69550 |
| Schizophrenia | rs1405059388 | 1 | LOC105371427 | T | Systolic blood pressure | 0.5541 | 68563 |
| Bipolar disorder | rs9371601 | 6 | SYNE1 | G | Systolic blood pressure | 0.3164 | 68686 |
| Bipolar disorder | rs10994397 | 10 | ANK3 | C | Systolic blood pressure | 0.8471 | 65972 |
| Bipolar disorder | rs12576775 | 11 | TENM4 | A | Systolic blood pressure | 0.3625 | 69046 |
| Alzheimer’s disease | rs190982 | 5 | MEF2C-AS1 | G | Systolic blood pressure | 0.4840 | 48794 |
| Alzheimer’s disease | rs1476679 | 7 | ZCWPW1 | C | Systolic blood pressure | 0.3730 | 65063 |
| Alzheimer’s disease | rs6656401 | 1 | CR1 | A | Systolic blood pressure | 0.6539 | 65265 |
| Alzheimer’s disease | rs7274581 | 20 | CASS4 | C | Systolic blood pressure | 0.0099 | 58215 |
| Alzheimer’s disease | rs10498633 | 14 | SLC24A4 | T | Systolic blood pressure | 0.0706 | 64410 |
| Alzheimer’s disease | rs10792832 | 11 | RNU6-560P, AP003097.2 | A | Systolic blood pressure | 0.4761 | 69049 |
| Alzheimer’s disease | rs10948363 | 6 | CD2AP | G | Systolic blood pressure | 0.9694 | 69537 |
| Alzheimer’s disease | rs11218343 | 11 | SORL1 | C | Systolic blood pressure | 0.9915 | 62523 |
| Alzheimer’s disease | rs35349669 | 2 | INPP5D | T | Systolic blood pressure | 0.9332 | 56919 |
| Schizophrenia | rs301797 | 1 | RERE, RERE-AS1 | A | Diastolic blood pressure | 0.1988 | 66790 |
| Schizophrenia | rs832187 | 3 | THOC7, C3orf49 | T | Diastolic blood pressure | 0.8352 | 66424 |
| Schizophrenia | rs1106568 | 4 | GPM6A | A | Diastolic blood pressure | 0.8709 | 69623 |
| Schizophrenia | rs1501357 | 5 | HCN1 | T | Diastolic blood pressure | 0.0653 | 69311 |
| Schizophrenia | rs1702294 | 1 | MIR137HG | T | Diastolic blood pressure | 0.5223 | 68348 |
| Schizophrenia | rs2007044 | 12 | CACNA1C | A | Diastolic blood pressure | 0.8923 | 69111 |
| Schizophrenia | rs2053079 | 19 | ZNF536 | A | Diastolic blood pressure | 0.0694 | 68495 |
| Schizophrenia | rs2693698 | 14 | BCL11B | A | Diastolic blood pressure | 0.1481 | 57872 |
| Schizophrenia | rs2905426 | 19 | GATAD2A, MAU2 | T | Diastolic blood pressure | 0.7308 | 68291 |
| Schizophrenia | rs2945232 | 8 | FAM86B3P, ALG1L13P | T | Diastolic blood pressure | 0.0517 | 60855 |
| Schizophrenia | rs2973155 | 5 | GRIA1, LINC01470 | T | Diastolic blood pressure | 0.7887 | 69688 |
| Schizophrenia | rs3735025 | 7 | DGKI | T | Diastolic blood pressure | 0.0694 | 68806 |
| Schizophrenia | rs3798869 | 6 | SNAP91 | A | Diastolic blood pressure | 0.7065 | 68259 |
| Schizophrenia | rs3849046 | 5 | ETF1 | T | Diastolic blood pressure | 0.7592 | 68950 |
| Schizophrenia | rs4129585 | 8 | TSNARE1 | A | Diastolic blood pressure | 0.2120 | 65508 |
| Schizophrenia | rs4391122 | 5 | ZSWIM6, LINC02057 | A | Diastolic blood pressure | 0.4299 | 65363 |
| Schizophrenia | rs4523957 | 17 | SRR | T | Diastolic blood pressure | 0.1780 | 63066 |
| Schizophrenia | rs4648845 | 1 | PLCH2 | T | Diastolic blood pressure | 0.5059 | 33345 |
| Schizophrenia | rs6065094 | 20 | PPP1R16B | A | Diastolic blood pressure | 0.3739 | 69720 |
| Schizophrenia | rs6430095 | 2 | Not reported | N | Diastolic blood pressure | 0.6778 | 67135 |
| Schizophrenia | rs6984242 | 8 | AC107934.2, AC107934.1 | A | Diastolic blood pressure | 0.9760 | 69484 |
| Schizophrenia | rs7193419 | 16 | AC018846.1, AC138305.1 | T | Diastolic blood pressure | 0.6601 | 68846 |
| Schizophrenia | rs7432375 | 3 | STAG1 | A | Diastolic blood pressure | 0.5115 | 69051 |
| Schizophrenia | rs7819570 | 8 | AC090578.1 | T | Diastolic blood pressure | 0.3361 | 66317 |
| Schizophrenia | rs7893279 | 10 | CACNB2 | T | Diastolic blood pressure | 0.4442 | 69720 |
| Schizophrenia | rs7951870 | 11 | DGKZ | T | Diastolic blood pressure | 0.9866 | 68860 |
| Schizophrenia | rs8044995 | 16 | NFATC3 | A | Diastolic blood pressure | 0.5360 | 69030 |
| Schizophrenia | rs8139773 | 22 | CACNA1I | A | Diastolic blood pressure | 0.1416 | 59958 |
| Schizophrenia | rs10520163 | 4 | CLCN3 | T | Diastolic blood pressure | 0.2246 | 66230 |
| Schizophrenia | rs11027857 | 11 | AC015771.1, RF00019 | A | Diastolic blood pressure | 0.9623 | 68640 |
| Schizophrenia | rs12129573 | 1 | RN7SKP19, LINC01360 | A | Diastolic blood pressure | 0.4041 | 69469 |
| Schizophrenia | rs12887734 | 14 | APOPT1, AL139300.1, KLC1 | T | Diastolic blood pressure | 0.4202 | 67238 |
| Schizophrenia | rs12903146 | 15 | AC104574.2 | A | Diastolic blood pressure | 0.7849 | 67819 |
| Schizophrenia | rs13217619 | 6 | ZSCAN31 | T | Diastolic blood pressure | 0.3643 | 65725 |
| Schizophrenia | rs13240464 | 7 | IMMP2L | T | Diastolic blood pressure | 0.9114 | 69582 |
| Schizophrenia | rs16867576 | 5 | MEF2C-AS1 | A | Diastolic blood pressure | 0.7307 | 65975 |
| Schizophrenia | rs17194490 | 3 | CNTN4 | T | Diastolic blood pressure | 0.0047 | 61588 |
| Schizophrenia | rs34796896 | 3 | FXR1 | A | Diastolic blood pressure | 0.4659 | 61742 |
| Schizophrenia | rs36068923 | 8 | AC090819.1, AC073023.1 | A | Diastolic blood pressure | 0.8338 | 68128 |
| Schizophrenia | rs58120505 | 7 | MAD1L1 | T | Diastolic blood pressure | 0.8720 | 68631 |
| Schizophrenia | rs59979824 | 2 | AC092638.1, PCGEM1 | A | Diastolic blood pressure | 0.6902 | 65157 |
| Schizophrenia | rs73036062 | 11 | IGSF9B | A | Diastolic blood pressure | 0.6384 | 67771 |
| Schizophrenia | rs75968099 | 3 | LINC02033, HSPD1P6 | T | Diastolic blood pressure | 0.5226 | 69554 |
| Schizophrenia | rs1405059388 | 1 | LOC105371427 | T | Diastolic blood pressure | 0.6963 | 68571 |
| Bipolar disorder | rs9371601 | 6 | SYNE1 | G | Diastolic blood pressure | 0.3936 | 68684 |
| Bipolar disorder | rs10994397 | 10 | ANK3 | C | Diastolic blood pressure | 0.5420 | 65974 |
| Bipolar disorder | rs12576775 | 11 | TENM4 | A | Diastolic blood pressure | 0.3303 | 69058 |
| Alzheimer’s disease | rs190982 | 5 | MEF2C-AS1 | G | Diastolic blood pressure | 0.1469 | 48789 |
| Alzheimer’s disease | rs1476679 | 7 | ZCWPW1 | C | Diastolic blood pressure | 0.2151 | 65105 |
| Alzheimer’s disease | rs6656401 | 1 | CR1 | A | Diastolic blood pressure | 0.4447 | 65290 |
| Alzheimer’s disease | rs7274581 | 20 | CASS4 | C | Diastolic blood pressure | 0.0064 | 58159 |
| Alzheimer’s disease | rs10498633 | 14 | SLC24A4 | T | Diastolic blood pressure | 0.0228 | 64422 |
| Alzheimer’s disease | rs10792832 | 11 | RNU6-560P, AP003097.2 | A | Diastolic blood pressure | 0.7091 | 69032 |
| Alzheimer’s disease | rs10948363 | 6 | CD2AP | G | Diastolic blood pressure | 0.5939 | 69546 |
| Alzheimer’s disease | rs11218343 | 11 | SORL1 | C | Diastolic blood pressure | 0.6961 | 62509 |
| Alzheimer’s disease | rs35349669 | 2 | INPP5D | T | Diastolic blood pressure | 0.7502 | 56882 |

| SNP = single nucleotide polymorphism; Chr = chromosome  *Allele asociated with higher risk of schizophrenia, bipolar disorder and Alzheimer’s disease. |
| --- |
|  |

**Table S4.** Associations of SNPs used in Mendelian randomization analysis with blood pressure.
