# Supplementary material for: Schizophrenia, Bipolar Disorder, and Alzheimer’s Disease are not Causal Factors of Bone Mineral Density: A Mendelian Randomization Analysis
Source: Springer Nature journal article supplement (doi:10.1007/s00223-019-00625-x), 2019-11-02
Supplement: MOESM9 [file 17343452]

| **Exposure** | **SNP** | **Chr** | **Mapped genes** | **Effect allele*** | **Confounding factors** | ***p-*Value** | **Sample size (N)** |
| --- | --- | --- | --- | --- | --- | --- | --- |
| Schizophrenia | rs301797 | 1 | RERE, RERE-AS1 | A | Alcohol consumption | 0.5426 | 112117 |
| Schizophrenia | rs832187 | 3 | THOC7, C3orf49 | T | Alcohol consumption | 0.5753 | 112117 |
| Schizophrenia | rs1106568 | 4 | GPM6A | A | Alcohol consumption | 0.0534 | 112117 |
| Schizophrenia | rs1501357 | 5 | HCN1 | T | Alcohol consumption | 0.0503 | 112117 |
| Schizophrenia | rs1702294 | 1 | MIR137HG | T | Alcohol consumption | 0.4685 | 112117 |
| Schizophrenia | rs2007044 | 12 | CACNA1C | A | Alcohol consumption | 0.3816 | 112117 |
| Schizophrenia | rs2053079 | 19 | ZNF536 | A | Alcohol consumption | 0.4277 | 112117 |
| Schizophrenia | rs2693698 | 14 | BCL11B | A | Alcohol consumption | 0.1261 | 112117 |
| Schizophrenia | rs2905426 | 19 | GATAD2A, MAU2 | T | Alcohol consumption | 0.6515 | 112117 |
| Schizophrenia | rs2945232 | 8 | FAM86B3P, ALG1L13P | T | Alcohol consumption | 0.0197 | 112117 |
| Schizophrenia | rs2973155 | 5 | GRIA1, LINC01470 | T | Alcohol consumption | 0.0675 | 112117 |
| Schizophrenia | rs3735025 | 7 | DGKI | T | Alcohol consumption | 0.4140 | 112117 |
| Schizophrenia | rs3798869 | 6 | SNAP91 | A | Alcohol consumption | 0.8935 | 112117 |
| Schizophrenia | rs3849046 | 5 | ETF1 | T | Alcohol consumption | 0.4395 | 112117 |
| Schizophrenia | rs4129585 | 8 | TSNARE1 | A | Alcohol consumption | 0.3740 | 112117 |
| Schizophrenia | rs4391122 | 5 | ZSWIM6, LINC02057 | A | Alcohol consumption | 0.4247 | 112117 |
| Schizophrenia | rs4523957 | 17 | SRR | T | Alcohol consumption | 0.1459 | 112117 |
| Schizophrenia | rs4648845 | 1 | PLCH2 | T | Alcohol consumption | 0.0036 | 112117 |
| Schizophrenia | rs6065094 | 20 | PPP1R16B | A | Alcohol consumption | 0.9984 | 112117 |
| Schizophrenia | rs6430095 | 2 | Not reported | N | Alcohol consumption | 0.1320 | 112117 |
| Schizophrenia | rs6984242 | 8 | AC107934.2, AC107934.1 | A | Alcohol consumption | 0.4576 | 112117 |
| Schizophrenia | rs7193419 | 16 | AC018846.1, AC138305.1 | T | Alcohol consumption | 0.7335 | 112117 |
| Schizophrenia | rs7432375 | 3 | STAG1 | A | Alcohol consumption | 0.3264 | 112117 |
| Schizophrenia | rs7819570 | 8 | AC090578.1 | T | Alcohol consumption | 0.9693 | 112117 |
| Schizophrenia | rs7893279 | 10 | CACNB2 | T | Alcohol consumption | 0.4630 | 112117 |
| Schizophrenia | rs7951870 | 11 | DGKZ | T | Alcohol consumption | 0.0486 | 112117 |
| Schizophrenia | rs8044995 | 16 | NFATC3 | A | Alcohol consumption | 0.4672 | 112117 |
| Schizophrenia | rs8139773 | 22 | CACNA1I | A | Alcohol consumption | 0.5682 | 112117 |
| Schizophrenia | rs10520163 | 4 | CLCN3 | T | Alcohol consumption | 0.2331 | 112117 |
| Schizophrenia | rs11027857 | 11 | AC015771.1, RF00019 | A | Alcohol consumption | 0.9293 | 112117 |
| Schizophrenia | rs12129573 | 1 | RN7SKP19, LINC01360 | A | Alcohol consumption | 0.3382 | 112117 |
| Schizophrenia | rs12887734 | 14 | APOPT1, AL139300.1, KLC1 | T | Alcohol consumption | 0.4287 | 112117 |
| Schizophrenia | rs12903146 | 15 | AC104574.2 | A | Alcohol consumption | 0.3264 | 112117 |
| Schizophrenia | rs13217619 | 6 | ZSCAN31 | T | Alcohol consumption | 0.2800 | 112117 |
| Schizophrenia | rs13240464 | 7 | IMMP2L | T | Alcohol consumption | 0.7926 | 112117 |
| Schizophrenia | rs16867576 | 5 | MEF2C-AS1 | A | Alcohol consumption | 0.0716 | 112117 |
| Schizophrenia | rs17194490 | 3 | CNTN4 | T | Alcohol consumption | 0.5819 | 112117 |
| Schizophrenia | rs34796896 | 3 | FXR1 | A | Alcohol consumption | 0.5806 | 112117 |
| Schizophrenia | rs36068923 | 8 | AC090819.1, AC073023.1 | A | Alcohol consumption | 0.0137 | 112117 |
| Schizophrenia | rs58120505 | 7 | MAD1L1 | T | Alcohol consumption | 0.0059 | 112117 |
| Schizophrenia | rs59979824 | 2 | AC092638.1, PCGEM1 | A | Alcohol consumption | 0.0050 | 112117 |
| Schizophrenia | rs73036062 | 11 | IGSF9B | A | Alcohol consumption | 0.4024 | 112117 |
| Schizophrenia | rs75968099 | 3 | LINC02033, HSPD1P6 | T | Alcohol consumption | 0.0550 | 112117 |
| Schizophrenia | rs1405059388 | 1 | LOC105371427 | T | Alcohol consumption | 0.1320 | 112117 |
| Bipolar disorder | rs9371601 | 6 | SYNE1 | G | Alcohol consumption | 0.1172 | 112117 |
| Bipolar disorder | rs10994397 | 10 | ANK3 | C | Alcohol consumption | 0.1050 | 112117 |
| Bipolar disorder | rs12576775 | 11 | TENM4 | A | Alcohol consumption | 0.3664 | 112117 |
| Alzheimer’s disease | rs190982 | 5 | MEF2C-AS1 | G | Alcohol consumption | 0.8111 | 112117 |
| Alzheimer’s disease | rs1476679 | 7 | ZCWPW1 | C | Alcohol consumption | 0.0246 | 112117 |
| Alzheimer’s disease | rs6656401 | 1 | CR1 | A | Alcohol consumption | 0.7900 | 112117 |
| Alzheimer’s disease | rs7274581 | 20 | CASS4 | C | Alcohol consumption | 0.1743 | 112117 |
| Alzheimer’s disease | rs10498633 | 14 | SLC24A4 | T | Alcohol consumption | 0.6635 | 112117 |
| Alzheimer’s disease | rs10792832 | 11 | RNU6-560P, AP003097.2 | A | Alcohol consumption | 0.0370 | 112117 |
| Alzheimer’s disease | rs10948363 | 6 | CD2AP | G | Alcohol consumption | 0.0989 | 112117 |
| Alzheimer’s disease | rs11218343 | 11 | SORL1 | C | Alcohol consumption | 0.7142 | 112117 |
| Alzheimer’s disease | rs35349669 | 2 | INPP5D | T | Alcohol consumption | 0.4034 | 112117 |

| SNP = single nucleotide polymorphism; Chr = chromosome  *Allele asociated with higher risk of schizophrenia, bipolar disorder and Alzheimer’s disease. |
| --- |
|  |

**Table S6.** Associations of SNPs used in Mendelian randomization analysis with alcohol consumption.
